# Supplementary material for: Generalized Carrier to Interference Ratio Analysis for the Shotgun Cellular System in Multiple Dimensions
Source: Royal Society of Chemistry journal article supplement (doi:10.1039/c9ra01948k), 2010-02-21
Supplement: c9ra01948k1.pdf [file c9ra01948k1.pdf]

# Aza-BODIPY Probe for Selective Visualization of Cyclooxygenase-2 in Cancer Cell

## Supporting Information

Thitima Pewklang,<sup>a,‡</sup> Kantapat Chansaenpak,<sup>b,‡</sup> Rung-Yi Lai,<sup>a</sup> Parinya Noisa<sup>c</sup> and Anyanee Kamkaew<sup>\*a</sup>

<sup>a</sup> School of Chemistry, Institute of Science, Suranaree University of Technology, Nakhon Ratchasima, Thailand 30000

<sup>b</sup> National Nanotechnology Center, National Science and Technology Development Agency, Thailand Science Park, Pathum Thani, Thailand 12120

<sup>c</sup> Laboratory of Cell-Based Assays and Innovations, School of Biotechnology, Institute of Agricultural Technology, Suranaree University of Technology, Nakhon Ratchasima, Thailand 30000

|                                                                                                                                   |   |
|-----------------------------------------------------------------------------------------------------------------------------------|---|
| 1. <sup>1</sup> H NMR, <sup>13</sup> C NMR, and MS results of compound <b>3</b> , <b>5</b> , and <b>AZB-IMC<sub>2</sub></b> ..... | 2 |
| 2. UV/Vis and fluorescence spectroscopic data of <b>AZB-IMC<sub>2</sub></b> in various solvents .....                             | 7 |
| 3. Fluorescence spectroscopic data of <b>AZB-IMC<sub>2</sub></b> in aqueous with and without 3% tween-80....                      | 8 |

# 1. $^1\text{H}$ NMR, $^{13}\text{C}$ NMR, and MS results of compound **3**, **5**, and AZB-IMC<sub>2</sub>

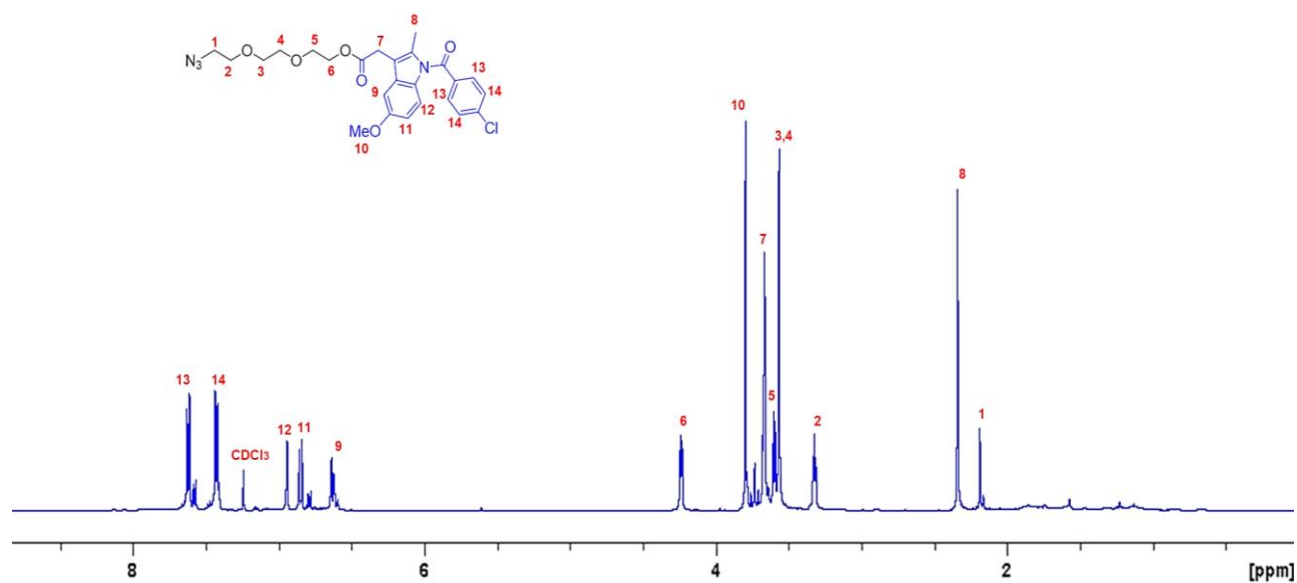

$^1\text{H}$  NMR of compound **3**

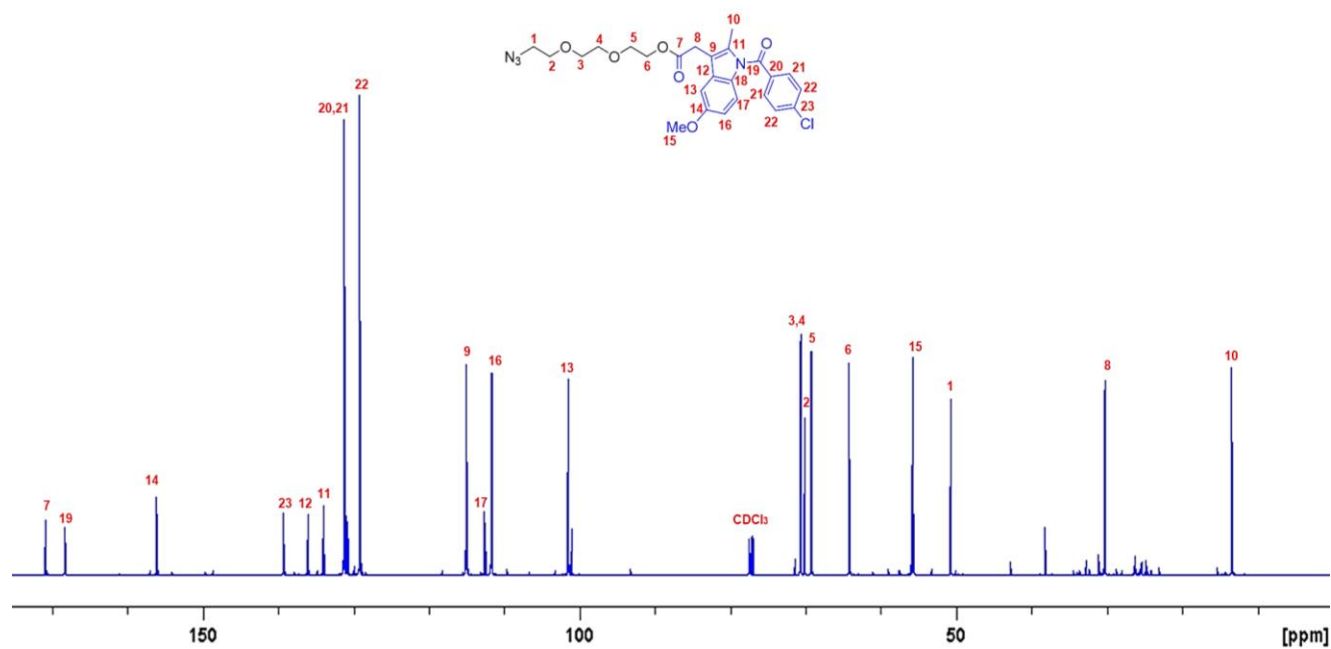

$^{13}\text{C}$  NMR of compound **3**

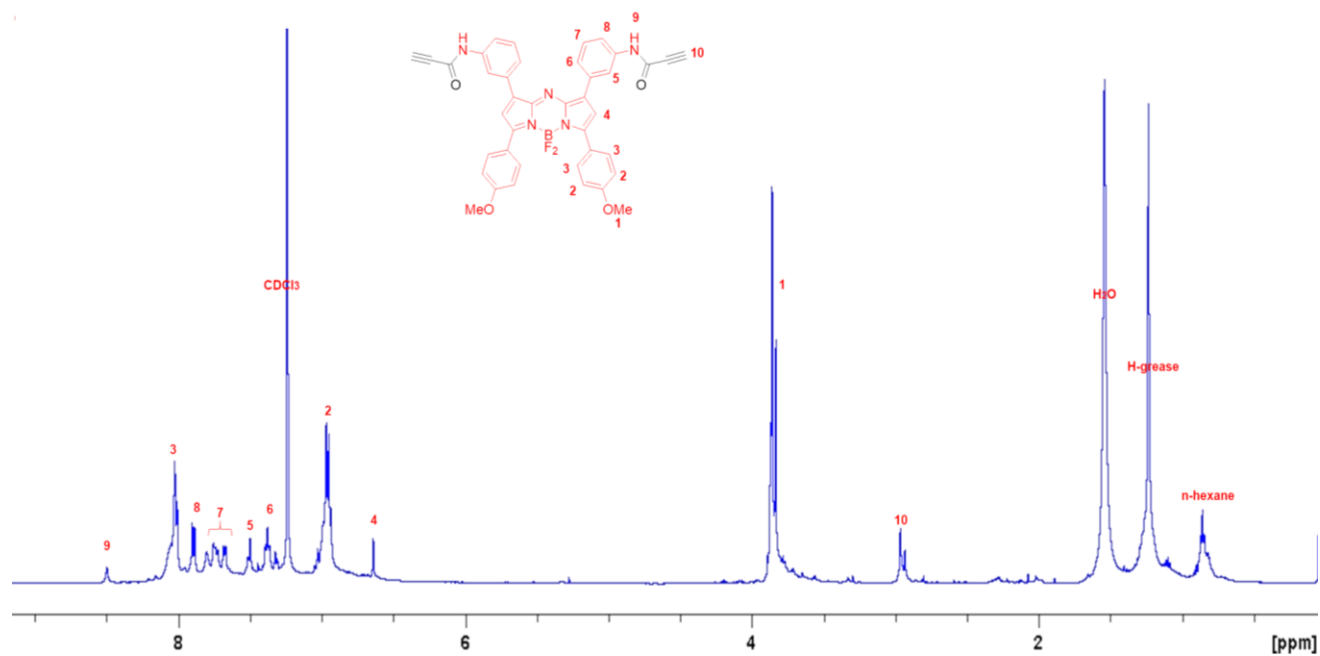

<sup>1</sup>H NMR of compound **5**

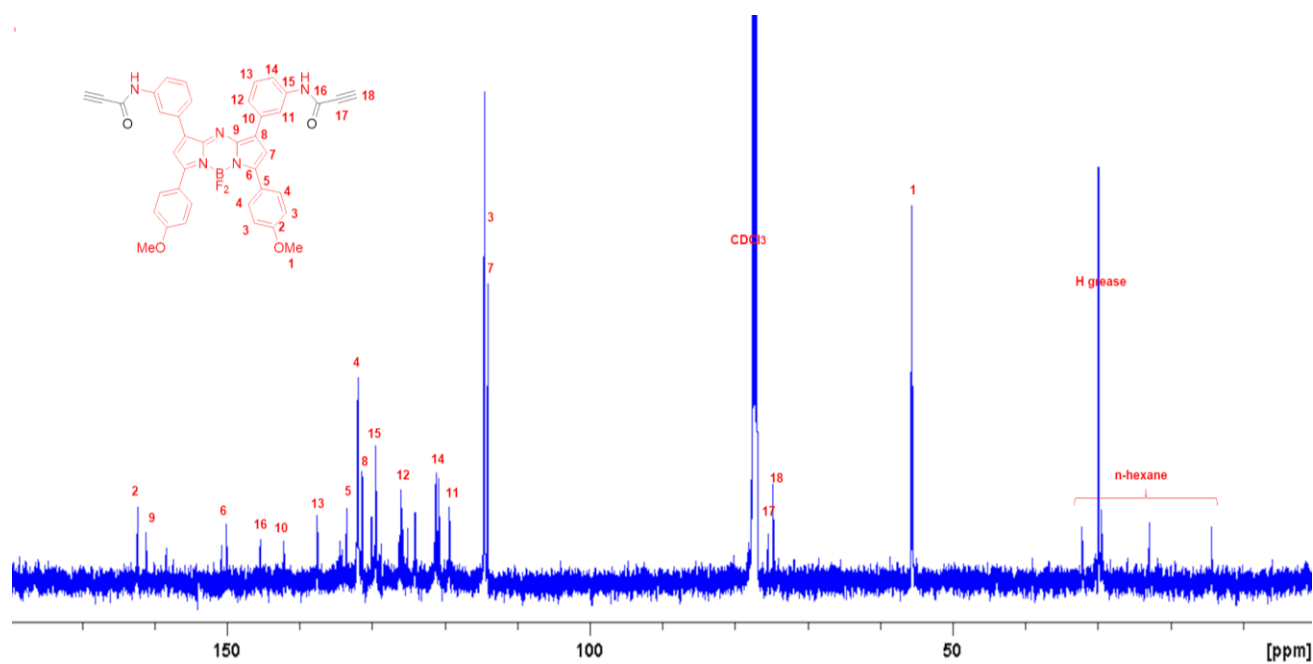

<sup>13</sup>C NMR of compound **5**

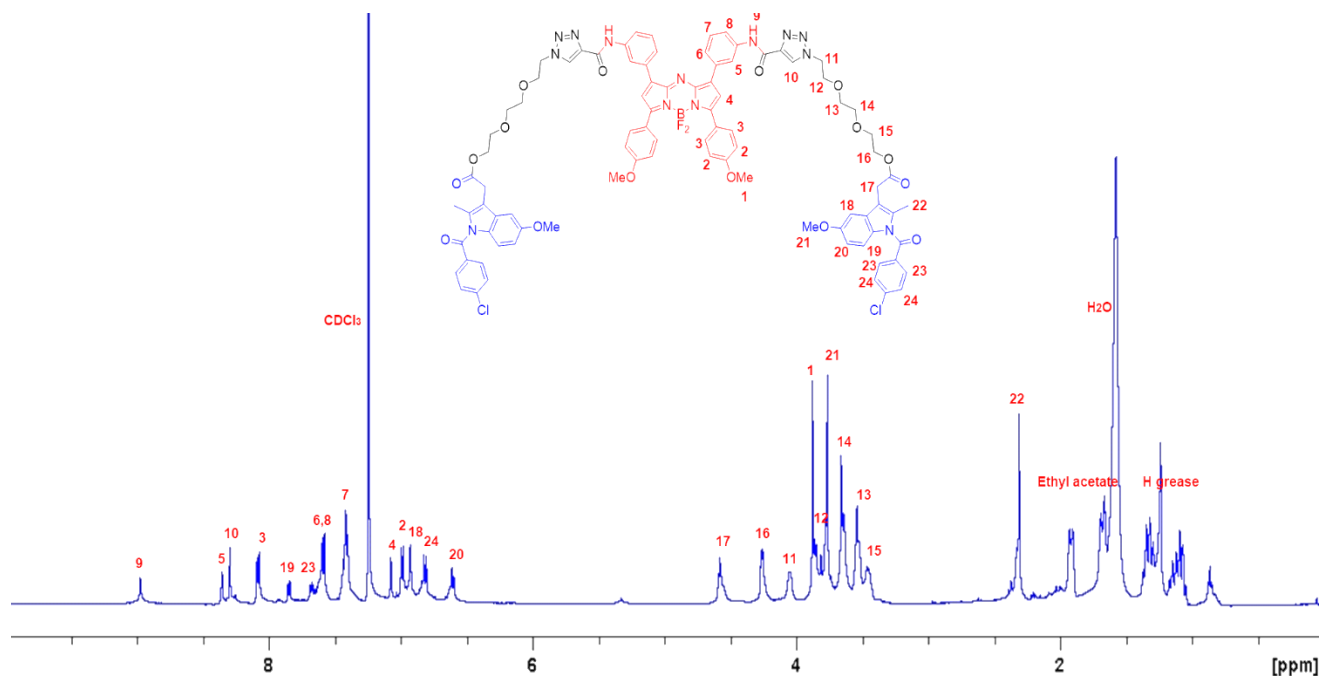

<sup>1</sup>H NMR of AZB-IMC<sub>2</sub>

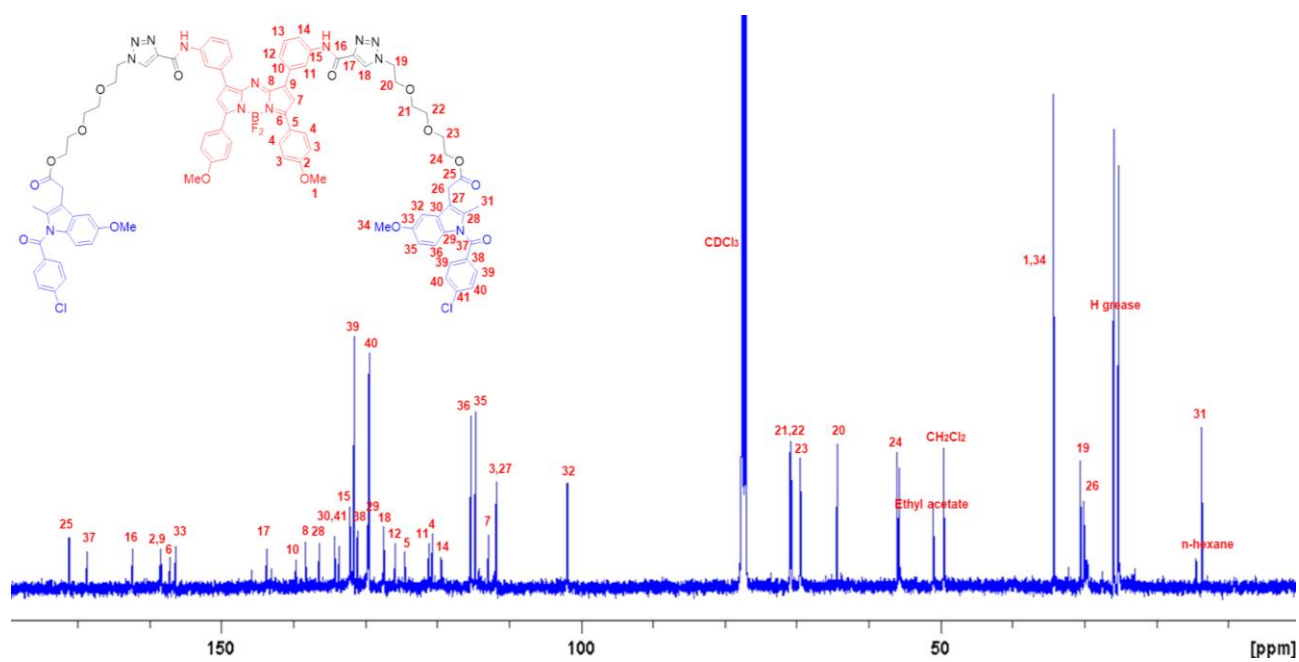

<sup>13</sup>C NMR of AZB-IMC<sub>2</sub>

# BIORESOURCES RESEARCH UNIT

## High resolution report

Analysis Name D:\Data\customer\PEG N3 Indomethacin.d  
 Method NaFormate\_pos.m  
 Sample Name PEG N3 Indomethacin

Acquisition Date 11/27/2018 1:54:49 PM

Operator Sutichai Ext: 3560  
 Instrument micrOTOF Bruker  
 Calibrate by Sodium Formate

### Acquisition Parameter

|             |            |                      |          |                  |           |
|-------------|------------|----------------------|----------|------------------|-----------|
| Source Type | ESI        | Ion Polarity         | Positive | Set Nebulizer    | 0.3 Bar   |
| Focus       | Not active |                      |          | Set Dry Heater   | 180 °C    |
| Scan Begin  | 100 m/z    | Set Capillary        | 4500 V   | Set Dry Gas      | 4.0 l/min |
| Scan End    | 1500 m/z   | Set End Plate Offset | -500 V   | Set Divert Valve | Source    |

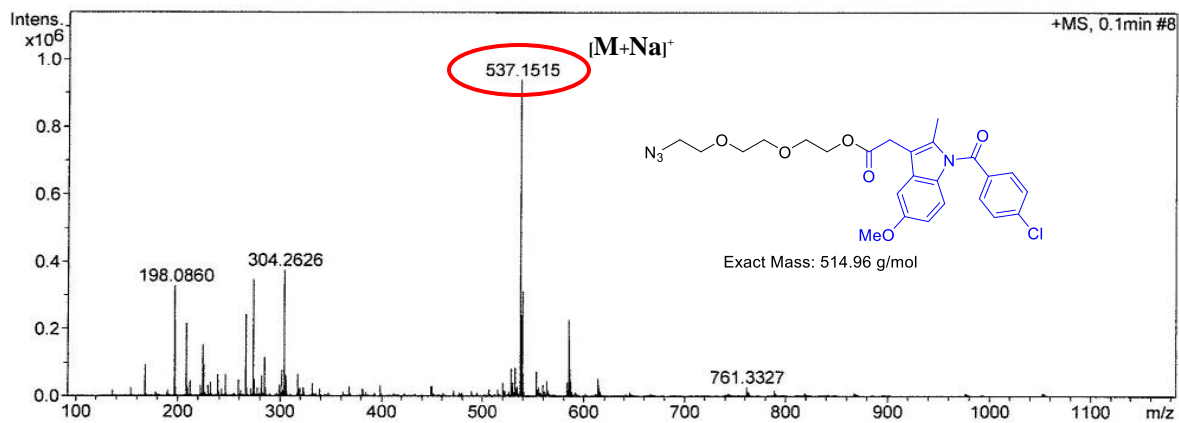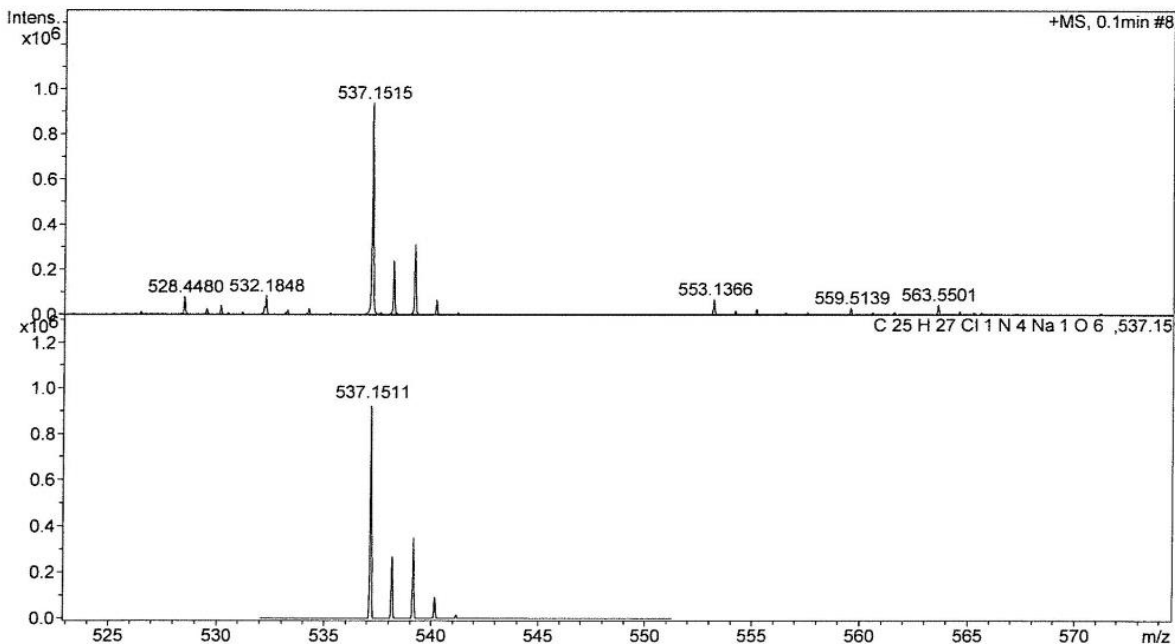

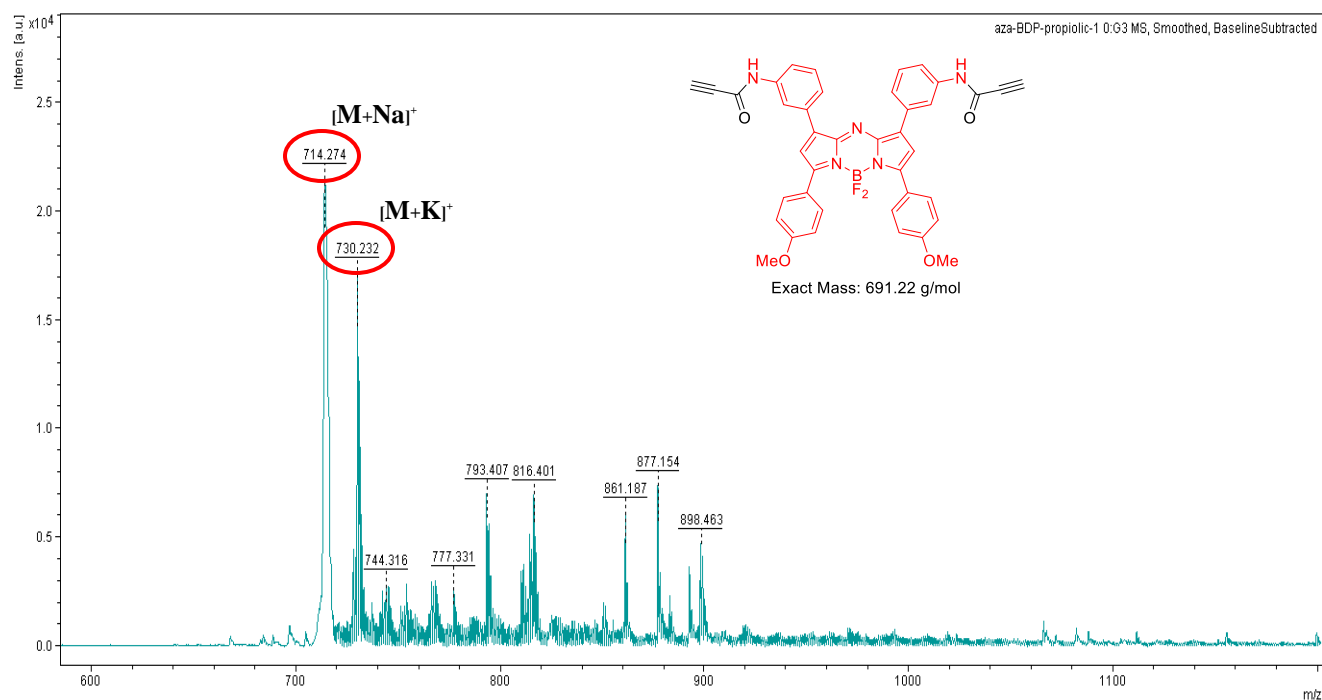

MALDI-TOF MS of compound **5**

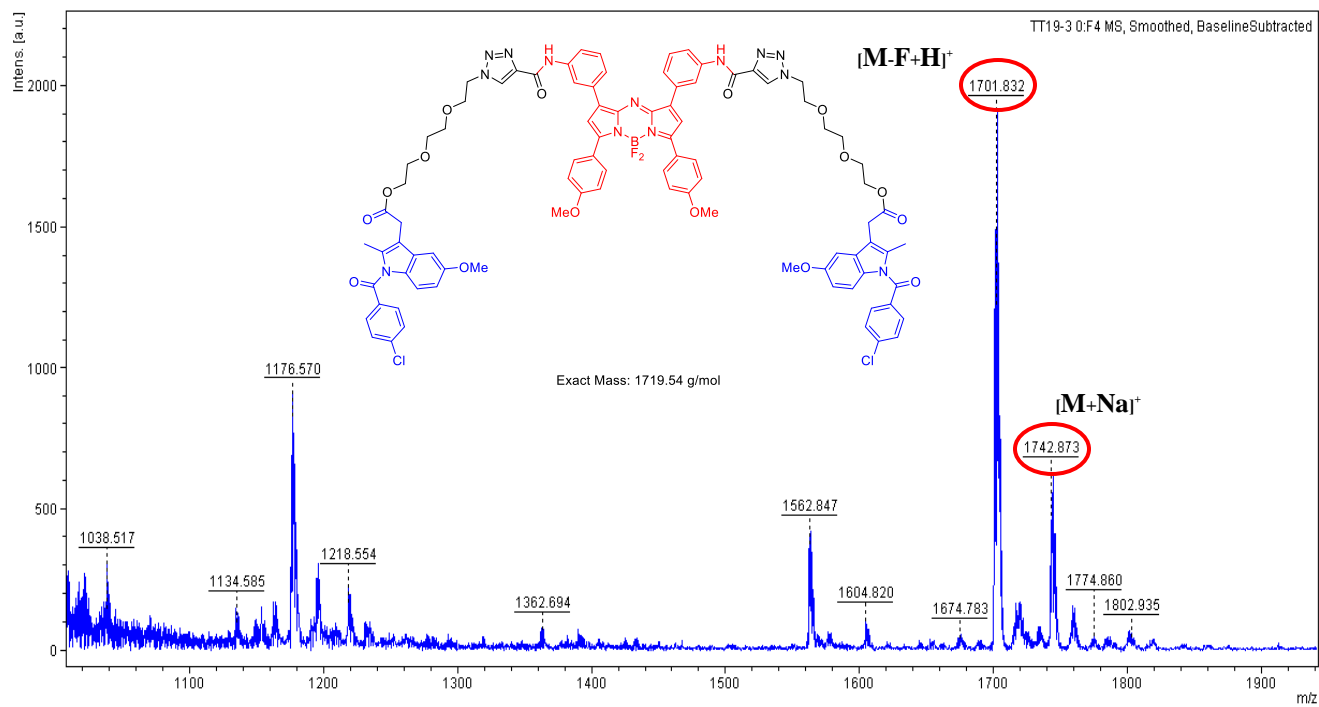

MALDI-TOF MS of **AZB-IMC<sub>2</sub>**

## 2. UV/Vis and fluorescence spectroscopic data of AZB-IMC<sub>2</sub> in various solvents

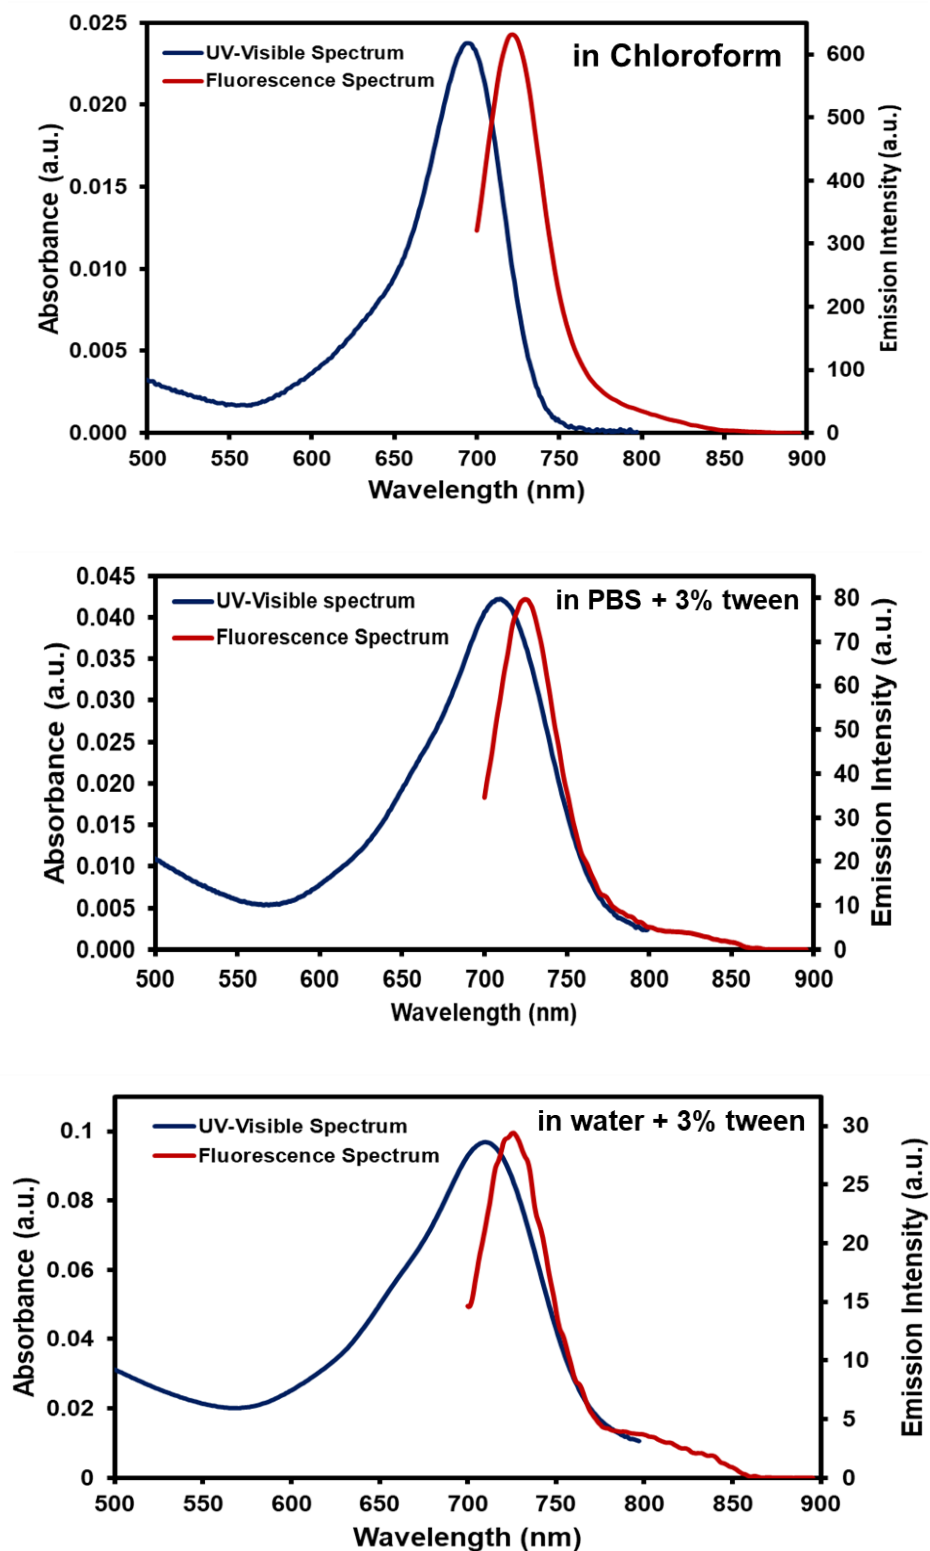

### 3. Fluorescence spectroscopic data of AZB-IMC<sub>2</sub> in aqueous with and without 3% tween-80

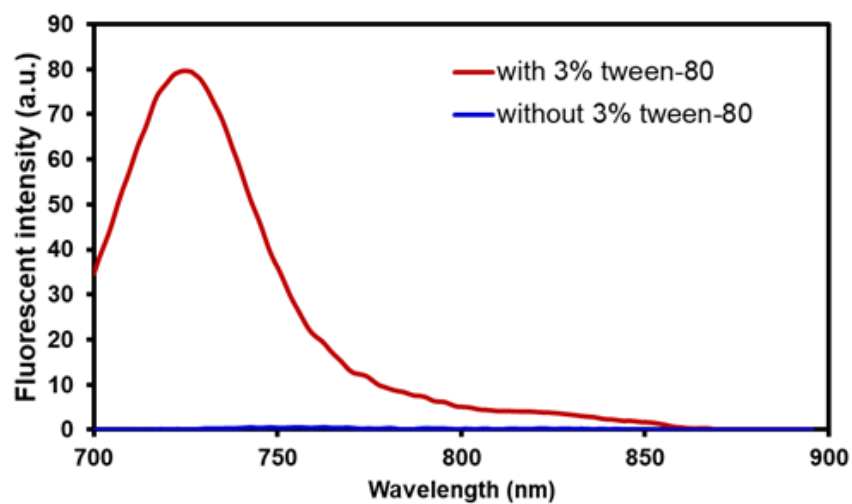

Fluorescent spectra of AZB-IMC<sub>2</sub> (2.9  $\mu$ M) excited at 670 nm in PBS solution with and without 3% tween-80

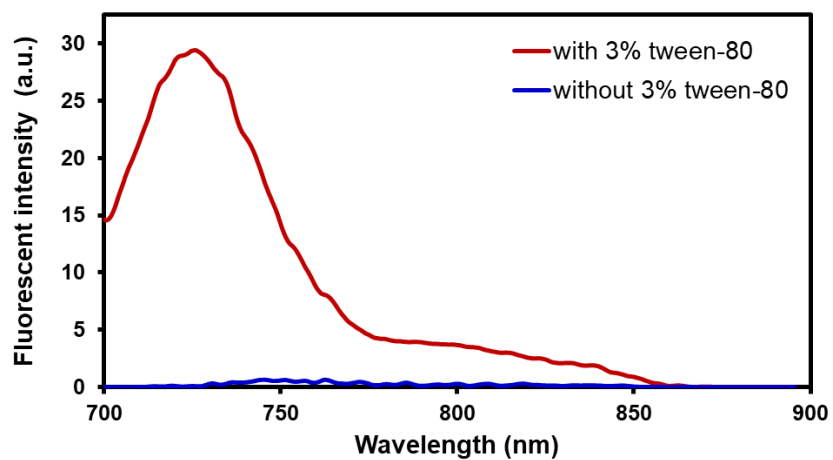

Fluorescent spectra of AZB-IMC<sub>2</sub> (2.9  $\mu$ M) excited at 670 nm in water with and without 3% tween-80
